# Supplementary material
Source: PubMed Central journal article supplement (PMC3633673)
Supplement: NIHMS449522-supplement-1.pdf [file NIHMS449522-supplement-1.pdf]

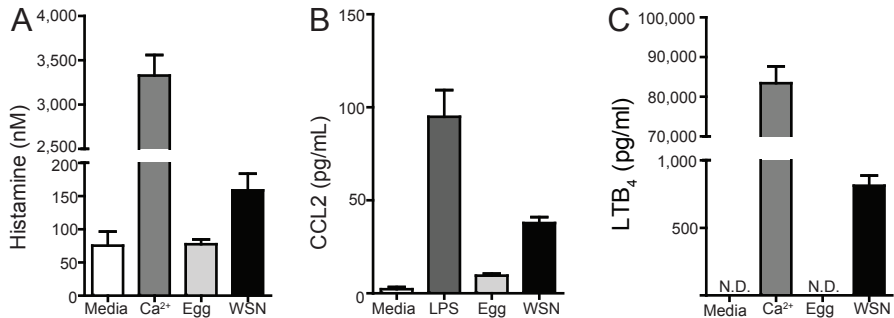

**Supplemental Figure 1. Naive allantoic fluid does not cause BMCMC activation.** BMCMC were derived by culturing total bone marrow with IL-3 for 5 weeks, supplementing with stem cell factor for the last 2 weeks.  $2.5 \times 10^5$  FcR $\epsilon$ 1<sup>+</sup> and CD117<sup>+</sup> BMCMC were treated with media, naive allantoic fluid, A/WSN/33 (WSN), or a positive control of calcium ionophore (Ca<sup>2+</sup>) at 40nM or LPS at 5mg/mL. (A) Histamine levels were measured by an EIA 30 minutes after stimulation. (B-C) Cytokine/chemokine (B) and LTB<sub>4</sub> (C) secretion were measured 6 hours after stimulation by either Milliplex<sup>TM</sup> multiplex analysis or an EIA, respectively. A/WSN/33 was added at an MOI of 1. Data are representative of 2 independent experiments. N.D. = none detected.

**Supplemental Table 1.** Cytokine and Chemokine Produced by BMCMC after A/WSN/33 treatment.<sup>1</sup>

|                        | A/WSN/33<br>(pg/ml) <sup>2</sup> |
|------------------------|----------------------------------|
| IL-1 $\beta$           | < LOD <sup>3</sup>               |
| IL-5                   | < LOD                            |
| IL-6                   | 742.8 $\pm$ 92.8                 |
| IL-9                   | < LOD                            |
| IL-15                  | < LOD                            |
| IFN $\alpha$           | < LOD                            |
| IFN $\beta$            | < LOD                            |
| IFN $\gamma$           | < LOD                            |
| TNF $\alpha$           | 12.7 $\pm$ 3.2                   |
| VEGF                   | < LOD                            |
| CCL2 (MCP-1)           | 89.1 $\pm$ 5.8                   |
| CCL3 (MIP-1 $\alpha$ ) | 169.6 $\pm$ 81.2                 |
| CCL4 (MIP-1 $\beta$ )  | 420.2 $\pm$ 36.8                 |
| CCL5 (RANTES)          | 71.3 $\pm$ 38.8                  |
| CXCL1 (KC)             | < LOD                            |
| CXCL2 (MIP-2)          | 17.4 $\pm$ 1.4                   |
| CXCL9 (MIG)            | 4.9 $\pm$ 2.7                    |
| CXCL10 (IP-10)         | 11.9 $\pm$ 2.3                   |

<sup>1</sup>To measure the ability of IAV to induce each cytokine or chemokine, 2.5x10<sup>5</sup> BMCMC mast cells were treated with A/WSN/33 at an MOI=1 for 6 h. At which time cytokine or chemokine levels in the supernants were measured by Luminex<sup>TM</sup> multiplex assays.

<sup>2</sup>Uninfected BMCMC had cytokine levels below the detection limit of the assays

<sup>3</sup>LOD = Limit of Detection; IL-1 $\beta$  = 2.0 pg/ml, IL-5 = 0.5 pg/ml, IL-9 = 6.0 pg/ml, IL-15 = 6.5 pg/ml, IFN $\alpha$  = 10.0 pg/ml, IFN $\beta$  = 10.0 pg/ml, IFN $\gamma$  = 0.9 pg/ml, VEGF = 0.3 pg/ml, CXCL1 (KC) = 1.4 pg/ml
